# Supplementary material
Source: Springer Nature journal article supplement (https://www.springermedizin.de/resource/supplementary/12947_2010_330_MOESM3_ESM.pdf/9556716)

**PVR (U.W.- RHG)**

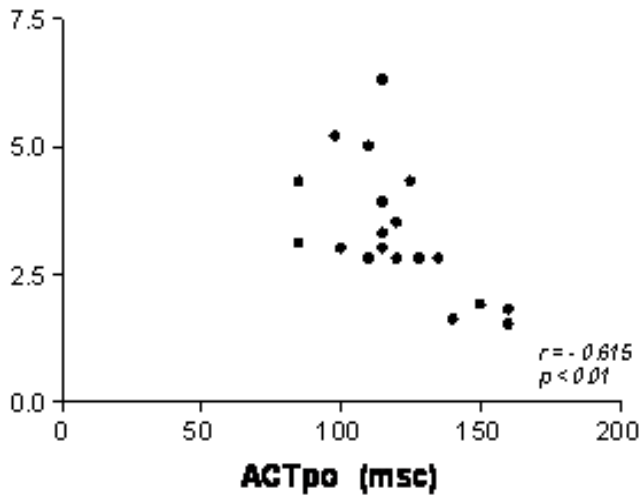

Supplement: MOESM3 [file 9556716]
